# Supplementary material
Source: PubMed Central journal article supplement (PMC3601493)
Supplement: prot0080-0884-SD1.pdf [file prot0080-0884-SD1.pdf]

# Supplemental Material to: Resolution-adapted recombination of structural features significantly improves sampling in restraint guided structure calculation.

Oliver F. Lange and David Baker

## 1. TABLE OF CONTENTS

|                                               |          |
|-----------------------------------------------|----------|
| <b>2. SUPPLEMENTARY METHODS</b> .....         | <b>1</b> |
| 2.1. MPI-FRAMEWORK.....                       | 1        |
| 2.1.1. <i>Overview</i> .....                  | 1        |
| 2.1.2. <i>FileBuffJobDistributor</i> .....    | 2        |
| 2.1.3. <i>ArchiveJobDistributor</i> .....     | 2        |
| 2.1.4. <i>FileBuf</i> .....                   | 2        |
| 2.1.5. <i>MasterProcess</i> .....             | 3        |
| 2.2. NMR RESTRAINTS FOR BENCHMARK .....       | 5        |
| 2.2.1. <i>Simulated RDC restraints</i> .....  | 5        |
| 2.2.2. <i>NOE Restraints</i> .....            | 5        |
| 2.2.3. <i>RDC Restraint Input Files</i> ..... | 6        |
| 2.2.4. <i>NOE Restraint Input Files</i> ..... | 18       |

## 2. SUPPLEMENTARY METHODS

### 2.1. MPI-FRAMEWORK

#### 2.1.1. OVERVIEW

The `JobDistributor` maintains a job-list and applies an instance of `Mover` to each job. In single processor-mode the `JobDistributor` will look in the designated output file which job has already been processed. Originally the output file was scanned before each new job is processed, however, this can lead to file system contention. A safer version looks for existing output only at start-up, but this renders workload management between multiple processes impossible. Moreover, it is not possible to write to a single output file from multiple processes due to unhandled race conditions.

The Message Passing Interface (MPI) allows platform independent communication between processes and has been used for dynamic workload management and control of race conditions in resource allocation (i.e., output file). Previous MPI-specializations of the `JobDistributor`, the `MPIWorkPoolJobDistributor` and `MPIWorkPartitionJobDistributor`, block after a job succeeded such that file-IO race conditions are avoided. However, this implies a long-wait

time during which file-IO takes place and does not avoid race-conditions for protocols that want to write to more than the official output file. However, this is the case for the conformational-slope protocol, which requires writing of intermediate snapshots. The `MPIFileBufJobDistributor` overcomes these issues by separating IO from workload management (Figure 2; main text). Thus, in *batch* mode two processes are dedicated to job distribution and file-IO. In *iterative* mode an additional *master* process is introduced that issues new batches to the batch-queue.

### 2.1.2. FILEBUFJOB DISTRIBUTOR

The `jd2::MPIFileBufJobDistributor` is inherited from `jd2::JobDistributor` and overrides the virtual functions `go`, `get_new_job_id`, `new_batch`, and `job_succeeded`. Further, it provides new hooks, to allow further specialization, most importantly `process_message`.

Incoming MPI messages are processed in `process_message()`, messages are `NEW_JOB_ID`, `BAD_INPUT`, and `JOB_SUCCESS`. Slave jobs ask for a new job- and batch-ID. The jobID is an index into the job-list, the batchID identifies the job-list to be used. If no more jobs are available the slave receives a `NULL` job-ID that causes him to spin down.

Batches are a set of jobs that are generated by a common set of flags. Usually all batches are known from the start. They can be given to the command-line by `run:batches flags1 flags2 flags3` etc.

### 2.1.3. ARCHIVEJOB DISTRIBUTOR

In *iterative* mode batches are not known at start time, but are generated based on structural analysis of incoming decoys. To allow dynamic additions to the batch-queue the `MpiFileBufJobDistributor` is extended to the `MPIArchiveJobDistributor`. A `BATCH_SYNC` message is issued by a slave process that received a job with batchID larger than the slave's `nr_batches()`. Subsequently, `batchID-nr_batches()` `ADD_BATCH` messages are sent to update the slaves batch-list. Newly generated batches are added to the master batch queue by the `JobDistributor` upon receipt of an `ADD_BATCH` message from the `ArchiveManager`-process. Old but still unprocessed batches can be obsoleted from the `ArchiveManager` by sending a `CANCEL_BATCH` message to the `Jobdistributor`. No more jobs from a cancelled batch are issued and incoming decoys are not passed on to the `ArchiveManager`. This is mainly used when switching to a new resampling stage.

When the batch-queue is empty the `ArchiveManager` is prompted for additional work before taking the default action of spinning down. To this end, the virtual `batch_underflow()` method has been overridden to send a `QUEUE_EMPTY` message to the `ArchiveManager`.

### 2.1.4. FILEBUF

All work processes that work on the same batch write their results into the same set of files. Parallelization is now completely hidden from work-processes and setup, i.e., no process-dependent filenames, such as `result_0001`, `result_0002`, etc, are necessary. File output in Rosetta is generally handled via the `ozstream` class, as a requirement to be able to build the the Rosetta@home executable. To allow parallel output for all Rosetta protocols without changes in protocol source code, we simply replace the underlying `streambuf` of the `ozstream` object. The replacement with `mpi_stream_buf` (`mpistream.hh`) is triggered by calling the static method `enable_MPI_reroute()` (done in `::go` method of `MPIXXXJobDistributor`).

File-operations such as `open`, `close`, `write` and `flush` are now related to the dedicated IO-process that runs an instance of `MPIFileBuffer`. Each file opened by a slave process creates a corresponding buffer in `MPIFileBuffer`, whose contents is only written to disk after `flush()` or `close()` is called on the `mpi_stream_buf`. Typical behavior for ROSETTA protocols is to open and close a file for each decoy generated. Thus, scrambling of lines between, e.g., silent-IO frames coming from different processes, is avoided by the unique slave-process dependent buffers.

For communication between `mpi_stream_buf` and `MPIFileBuffer` the following messages have been created: `MPI_STREAM_OPEN`, `MPI_STREAM_SEND`, `MPI_STREAM_CLOSE`, and `MPI_STREAM_FLUSH`. Messages `MPI_BLOCK_FILE` and `MPI_RELEASE_FILE` are used in *iterative* mode to avoid race-conditions when decoys are read by the master process (`ArchiveManager`) while slave-processes are writing into the same file. Due to the buffered output slave-process continue writing despite the blocking, however, finished frames (`flush/close`) will not be written from the internal buffer to the disk.

### 2.1.5. MASTERPROCESS

#### a. **ArchiveManager**

An instance of `ArchiveManager` is the top-level controller in *iterative* mode. This class encapsulates all basic infrastructure work that is common to any iterative protocol while high-level details, i.e., decision making, is handed over to an instance of an `ArchiveBase`. The most important interface methods of `ArchiveBase` called by the `ArchiveManager` are `generate_batches()` and `read_structures()`. The former is called when the `QUEUE_EMPTY` message has been received from the `Jobdistributor` (see above) and the latter method is called when new decoys are available in one of the batches output files.

When the `ArchiveManager` receives `JOB_COMPLETION` messages issued by the job-distributor it reads the respective output file and compares decoys-tag to figure out which decoys in the file have not been read into the archive. The decoys with new tags are read and forwarded to the the Archive using `read_structures()`. Additionally, the Manager oversees storing of recovery information and restart, the cancelling of batches and transmission of a stop-signal to the `Jobdistributor` if no new batches are generated.

For each new batch a directory `batch_nnnnn` is created where `nnnn` represents the number of the batch. This directory contains flags and setup files, and takes all output-files. The directory contains a file `BATCH_INFO` which is maintained by the `ArchiveManager` to store status information regarding that batch in case that a run has to be restarted. The class `Batch` provides filenames for the typical files (flags, setup-files, output-decoys) and represents the `BATCH_INFO` information in memory.

## **b. The ArchiveBase Hierarchy**

### *b.i. ArchiveBase*

The `ArchiveBase` provides an interface for a general controller of iterative protocols that maintain a pool of structures as common feature. It provides methods `read_structures()` to add fresh decoys to the archive, and `generate_batches()` to issue new (resampling) work. Moreover, the interface provides hooks to save and restore the archive content and status.

### *b.ii. EvaluatedArchive*

For RASREC, the decision which structures to keep, is based on a weighted sum of scores. This decision is handled by the `EvaluatedArchive` subclass. Any iterative protocol that is based on a pool of structures that are selected via a weighted sum of energies and other metrics would be derived from this class. To give a negative example, a Pareto selection scheme, for instance, would have to implement a different selection scheme, and would not be derived from this class.

A clean modular design would compute all energies and metrics of incoming decoys when they arrive. However, on the BG/P system with relatively slow single processors and 2048 slave processors rescoring of incoming structures was too expensive. Benchmarking revealed that not the rescoring, as one would expect, but the generation of poses out of silent-file frames was causing the bottleneck. To avoid this problem a non-local evaluation is toggled by `set_evaluate_local( false )` such that finished decoys have to be evaluated from the generated slave-job before submitted to file. The compound-score is stored as `score_final` in the silent-file. Obviously, with decoys coming from different batches care has to be taken that the values in `score_final` are consistent. This is really against good software engineering practice and caused all the commonly expected problems. Much later we found a way to make pose-generation out of silent-frames much faster (as implemented in current svn), such that the non-local evaluation might be obsolete. This design-decision is worth revisiting before further method-development.

Individual metrics or energies can be computed from each incoming decoy using instances of `evaluation::PoseEvaluator` and an instance of `ScoreFunction`. The weighted sum is cached as `_archive_select_score_` in the silent-struct of each archived decoy. Only when weights are changed or score-terms added, these values get re-evaluated. All necessary book-keeping for the caching mechanism is handled by `EvaluatedArchive`.

### *b.iii. IterativeBase (RASREC\_Base)*

The logic of the RASREC protocol is implemented in classes IterativeCentroid (stages I-IV) and IterativeFullatom (stages V-VI), both classes are derived from IterativeBase. A wrapper class called IterativeAbrelax bundles IterativeCentroid and IterativeFullatom into a single object. Most of the functionality is implemented in the base class.

The class overloads `generate_batch()` to issue new batches based on its pool of decoys (accessed with `decoys()`).

Methods to setup input files for the batches are called `gen_XXX` and are invoked in stage-dependent manner from `generate_batch()`. These methods are `gen_enumerate_pairings(I-II)`, `gen_resample_topologies(II-III)`, `gen_resample_stage2(IV)`, `gen_resample_fragments(IV-VI)`, `gen_cen2fullatom(V)`, `gen_cen2fullatom_non_pool_decoys(V)` in IterativeBase and `gen_resample_core(VI)` in IterativeFullatom. When `non_local` evaluation is activated the method `gen_evaluation_output` is called for each batch to add the computation of the scores and energies used for decoy selection. These functions are called with an instance of Batch as the only parameter, the generating functions add specific flags to the flag-file provided by Batch and add special input-files to the directory provided by Batch.

In stage V half of the generated batches start an all-atom refinement from the archived structures. The other 50% of stage V-generated decoys are started from randomly selected decoys from all previous batches. This hedging yields a broader sampling of the all-atom energy function and thus ensures that a converged full-atom ensemble is only found if its all-atom energies are indeed much lower than those of surrounding conformational space.

## 2.2. NMR RESTRAINTS FOR BENCHMARK

Experimental chemical shift data was used in all calculations. Experimental or simulated RDC and NOE data was used as indicated in Table 1 of the main text. Details on restraint generation are given below. Experimental NOE data were used for proteins ER541, BtR324B, ARF1, and ALG13, and for 1i1b, 1i1b<sup>2</sup> and 2z2i NOE restraints were simulated.

### 2.2.1. SIMULATED RDC RESTRAINTS

Simulated RDCs were calculated from an ensemble of 20 structures obtained by relaxing the native structure within the Rosetta all-atom energy and adding Gaussian noise of 0.3Hz amplitude relative to a typical tensor amplitude of  $D_a=10\text{Hz}$ . The structural variation in the RDC generating ensemble renders the simulated data more realistic: even before noise is added no single structure can be fitted to the RDCs with  $Q < 10\%$ ; the native structure fits the resulting RDCs with a  $Q$ -factor of 17-30%. The noise amplitude of 0.3Hz used here might be unrealistically small in the context of the larger structures and noise estimates around  $\pm 1$  or even  $\pm 2$  Hz might be more realistic. In practice, however, the magnitude of the added noise is relatively unimportant when used within a quadratic restraint potential. Thus the structural noise is far more detrimental to structure determination.

### 2.2.2. NOE RESTRAINTS

#### a. Experimental

For 2jyx and 2kd7 distance restraints based on experimental NOEs were taken from the published data set (BtR324B, PDB id: 2kd7; ER541, PDB id: 2jyx and ARF1, PDB id: 2k5u). To determine which of those published NOE cross-peaks would be unambiguously and automatically assignable from a 4D NOESY we filtered for  $H_N$ - $H_N$  peaks that were separated from each other by more than the typical tolerance used in automated NOESY assignment for the ( $^1H$  direct/ $^1H$  indirect/ $^{15}N$ ) dimensions (0.03/0.05/0.4 ppm). We have deliberately chosen a more conservative set of tolerances than the usually employed (0.02/0.05/0.2ppm) to make sure that structure calculation from the generated set of sparse NOEs is not easier than during a blind calculation.

## b. Simulated

For 1i1b, 2rn2, 2z2i, 1sua and 1g68 NOE distance constraints were generated from the native structure as follows: for each  $H_N$ - $H_N$  distance  $< 4 \text{ \AA}$  we generated a constraint with lower bound of  $1.5 \text{ \AA}$  and upper bound of  $6 \text{ \AA}$ . For protein 1i1b we also generated a set of  $H_N$ - $H_N$  NOEs with a cutoff  $< 5 \text{ \AA}$ . The results for this data set are reported as 1i1b2. Normally  $5\text{-}6 \text{ \AA}$  is the detection limit in protonated samples. For deuterated samples and long NOE mixing times one can see peaks for amide protons up to  $7 \text{ \AA}$  apart. In analogy to our conservative strategy for ER541 and BtR324B we have deliberately chosen the conservative cutoff of  $4 \text{ \AA}$ .

### 2.2.3. RDC RESTRAINT INPUT FILES

#### a. 2jyx

```
3 N 3 H -3.6280
4 N 4 H -9.3940
5 N 5 H -7.8340
8 N 8 H -7.8780
10 N 10 H -7.7780
11 N 11 H -11.1400
12 N 12 H -5.3120
13 N 13 H -5.3920
14 N 14 H -5.0560
16 N 16 H -10.1640
17 N 17 H -8.2040
22 N 22 H -4.6820
23 N 23 H -7.8860
24 N 24 H -11.9500
27 N 27 H -10.8740
29 N 29 H 0.5020
33 N 33 H -16.6080
34 N 34 H -4.9420
35 N 35 H -7.8820
37 N 37 H -9.8440
38 N 38 H -3.3660
39 N 39 H -9.4800
40 N 40 H -11.4720
43 N 43 H -7.7460
45 N 45 H -9.5860
46 N 46 H 2.6160
48 N 48 H 12.7020
49 N 49 H 4.0240
51 N 51 H -6.0340
52 N 52 H -8.4460
53 N 53 H -11.9780
56 N 56 H -2.9400
57 N 57 H 0.8380
58 N 58 H 13.3740
```

|     |   |     |   |          |
|-----|---|-----|---|----------|
| 59  | N | 59  | H | 11.3080  |
| 60  | N | 60  | H | -8.8420  |
| 61  | N | 61  | H | -11.3720 |
| 62  | N | 62  | H | 1.1740   |
| 63  | N | 63  | H | 9.9300   |
| 64  | N | 64  | H | 10.9360  |
| 65  | N | 65  | H | -8.3140  |
| 66  | N | 66  | H | 17.7640  |
| 67  | N | 67  | H | 10.3380  |
| 68  | N | 68  | H | -8.4620  |
| 69  | N | 69  | H | 15.2000  |
| 70  | N | 70  | H | 1.2020   |
| 71  | N | 71  | H | -6.1980  |
| 73  | N | 73  | H | -7.0520  |
| 74  | N | 74  | H | 5.3080   |
| 75  | N | 75  | H | 2.2140   |
| 76  | N | 76  | H | 3.8880   |
| 79  | N | 79  | H | -0.9720  |
| 80  | N | 80  | H | -3.9920  |
| 81  | N | 81  | H | -7.0320  |
| 83  | N | 83  | H | -6.1320  |
| 84  | N | 84  | H | -0.0120  |
| 85  | N | 85  | H | 8.4380   |
| 86  | N | 86  | H | 1.6280   |
| 89  | N | 89  | H | -6.8380  |
| 90  | N | 90  | H | -9.3620  |
| 91  | N | 91  | H | -9.5760  |
| 92  | N | 92  | H | -4.7120  |
| 93  | N | 93  | H | 8.8300   |
| 94  | N | 94  | H | 5.6300   |
| 96  | N | 96  | H | -8.6280  |
| 99  | N | 99  | H | 6.0660   |
| 102 | N | 102 | H | 22.4560  |
| 104 | N | 104 | H | -11.8900 |
| 105 | N | 105 | H | -4.5080  |
| 106 | N | 106 | H | 1.9760   |
| 107 | N | 107 | H | -6.8800  |
| 109 | N | 109 | H | 10.9020  |
| 110 | N | 110 | H | 22.0860  |
| 112 | N | 112 | H | 1.6920   |
| 113 | N | 113 | H | 12.3020  |
| 114 | N | 114 | H | 14.7140  |
| 115 | N | 115 | H | -7.2500  |
| 116 | N | 116 | H | -5.4580  |
| 117 | N | 117 | H | -5.3860  |
| 118 | N | 118 | H | 2.3080   |
| 119 | N | 119 | H | 4.4760   |
| 120 | N | 120 | H | 14.1800  |
| 121 | N | 121 | H | -2.3640  |

**b. 2kd7**

**b.i. medium 1**

|    |   |    |   |        |
|----|---|----|---|--------|
| 5  | H | 5  | N | 0.878  |
| 6  | H | 6  | N | 7.097  |
| 7  | H | 7  | N | -4.349 |
| 10 | H | 10 | N | -7.208 |
| 11 | H | 11 | N | -0.766 |
| 12 | H | 12 | N | -1.884 |
| 13 | H | 13 | N | -1.105 |
| 15 | H | 15 | N | -2.404 |
| 16 | H | 16 | N | -0.332 |

|     |   |     |   |        |
|-----|---|-----|---|--------|
| 18  | H | 18  | N | 1.532  |
| 19  | H | 19  | N | -0.783 |
| 28  | H | 28  | N | -3.398 |
| 29  | H | 29  | N | -5.943 |
| 30  | H | 30  | N | -3.594 |
| 31  | H | 31  | N | -1.860 |
| 32  | H | 32  | N | 1.065  |
| 33  | H | 33  | N | -6.784 |
| 34  | H | 34  | N | -2.337 |
| 35  | H | 35  | N | 6.988  |
| 40  | H | 40  | N | 5.523  |
| 41  | H | 41  | N | 2.676  |
| 42  | H | 42  | N | -0.181 |
| 43  | H | 43  | N | -0.295 |
| 44  | H | 44  | N | -1.379 |
| 55  | H | 55  | N | -1.307 |
| 56  | H | 56  | N | -1.621 |
| 57  | H | 57  | N | -1.489 |
| 58  | H | 58  | N | 0.232  |
| 59  | H | 59  | N | -1.802 |
| 61  | H | 61  | N | -3.962 |
| 62  | H | 62  | N | -2.436 |
| 63  | H | 63  | N | 4.146  |
| 65  | H | 65  | N | 0.323  |
| 66  | H | 66  | N | -3.927 |
| 67  | H | 67  | N | -4.535 |
| 68  | H | 68  | N | -4.373 |
| 70  | H | 70  | N | 1.051  |
| 73  | H | 73  | N | 0.319  |
| 75  | H | 75  | N | -6.735 |
| 83  | H | 83  | N | -6.255 |
| 84  | H | 84  | N | -4.867 |
| 85  | H | 85  | N | -0.729 |
| 86  | H | 86  | N | -1.374 |
| 87  | H | 87  | N | -0.470 |
| 88  | H | 88  | N | -1.009 |
| 90  | H | 90  | N | -3.783 |
| 91  | H | 91  | N | -6.332 |
| 98  | H | 98  | N | -4.827 |
| 100 | H | 100 | N | 2.175  |
| 102 | H | 102 | N | 0.243  |
| 103 | H | 103 | N | -0.941 |
| 112 | H | 112 | N | -1.921 |
| 113 | H | 113 | N | 0.931  |
| 114 | H | 114 | N | 0.893  |
| 115 | H | 115 | N | 4.811  |
| 116 | H | 116 | N | -1.866 |
| 117 | H | 117 | N | 3.723  |
| 118 | H | 118 | N | -1.964 |
| 119 | H | 119 | N | -3.870 |
| 120 | H | 120 | N | -5.209 |
| 121 | H | 121 | N | -7.086 |
| 124 | H | 124 | N | -1.272 |
| 125 | H | 125 | N | 0.388  |
| 126 | H | 126 | N | -1.170 |
| 127 | H | 127 | N | -0.772 |
| 128 | H | 128 | N | -2.409 |
| 139 | H | 139 | N | -0.285 |
| 140 | H | 140 | N | -2.843 |
| 141 | H | 141 | N | -0.771 |
| 142 | H | 142 | N | 1.240  |
| 143 | H | 143 | N | 0.389  |



|     |   |     |   |        |
|-----|---|-----|---|--------|
| 145 | H | 145 | N | -1.198 |
| 146 | H | 146 | N | -2.342 |
| 147 | H | 147 | N | -5.694 |
| 149 | H | 149 | N | -7.735 |

***b.ii. medium 2***

|     |   |     |   |         |
|-----|---|-----|---|---------|
| 5   | H | 5   | N | -10.223 |
| 6   | H | 6   | N | -30.601 |
| 7   | H | 7   | N | 4.551   |
| 11  | H | 11  | N | 7.152   |
| 12  | H | 12  | N | 14.185  |
| 13  | H | 13  | N | 29.252  |
| 15  | H | 15  | N | 21.761  |
| 16  | H | 16  | N | 18.583  |
| 18  | H | 18  | N | -9.512  |
| 19  | H | 19  | N | -3.031  |
| 28  | H | 28  | N | 7.279   |
| 29  | H | 29  | N | 3.883   |
| 31  | H | 31  | N | 14.711  |
| 34  | H | 34  | N | 17.393  |
| 35  | H | 35  | N | -31.210 |
| 40  | H | 40  | N | -25.722 |
| 41  | H | 41  | N | 1.312   |
| 43  | H | 43  | N | 25.227  |
| 44  | H | 44  | N | 29.478  |
| 56  | H | 56  | N | 11.899  |
| 57  | H | 57  | N | 26.805  |
| 58  | H | 58  | N | 19.196  |
| 59  | H | 59  | N | 25.585  |
| 61  | H | 61  | N | 11.058  |
| 63  | H | 63  | N | -17.257 |
| 65  | H | 65  | N | -18.423 |
| 67  | H | 67  | N | 6.558   |
| 68  | H | 68  | N | 14.366  |
| 70  | H | 70  | N | 11.877  |
| 73  | H | 73  | N | 20.381  |
| 75  | H | 75  | N | 1.005   |
| 83  | H | 83  | N | 4.747   |
| 84  | H | 84  | N | 14.192  |
| 85  | H | 85  | N | 9.297   |
| 86  | H | 86  | N | 19.704  |
| 87  | H | 87  | N | 22.642  |
| 88  | H | 88  | N | 23.625  |
| 90  | H | 90  | N | 15.911  |
| 91  | H | 91  | N | 8.034   |
| 98  | H | 98  | N | 3.694   |
| 100 | H | 100 | N | 2.590   |
| 112 | H | 112 | N | 26.333  |
| 113 | H | 113 | N | 14.486  |
| 114 | H | 114 | N | 19.005  |
| 115 | H | 115 | N | -7.686  |
| 116 | H | 116 | N | -5.584  |
| 117 | H | 117 | N | -18.492 |
| 118 | H | 118 | N | 25.492  |
| 119 | H | 119 | N | 2.422   |
| 120 | H | 120 | N | 7.450   |
| 121 | H | 121 | N | 2.111   |
| 124 | H | 124 | N | 20.760  |
| 126 | H | 126 | N | 30.000  |
| 128 | H | 128 | N | 27.561  |
| 139 | H | 139 | N | 25.713  |

|     |   |     |   |         |
|-----|---|-----|---|---------|
| 143 | H | 143 | N | 24.560  |
| 145 | H | 145 | N | 4.975   |
| 146 | H | 146 | N | -3.623  |
| 147 | H | 147 | N | 2.305   |
| 149 | H | 149 | N | 3.441   |
| 150 | H | 150 | N | -16.199 |

**c. 1i1b**

|    |   |    |   |           |
|----|---|----|---|-----------|
| 2  | N | 2  | H | 6.39072   |
| 3  | N | 3  | H | 2.39428   |
| 4  | N | 4  | H | 4.89529   |
| 5  | N | 5  | H | 0.58501   |
| 6  | N | 6  | H | 4.34939   |
| 7  | N | 7  | H | 1.74593   |
| 8  | N | 8  | H | -11.77050 |
| 9  | N | 9  | H | -3.71675  |
| 10 | N | 10 | H | -6.01706  |
| 11 | N | 11 | H | 12.21313  |
| 12 | N | 12 | H | 2.85739   |
| 13 | N | 13 | H | 5.68243   |
| 14 | N | 14 | H | 2.68251   |
| 15 | N | 15 | H | 11.30584  |
| 16 | N | 16 | H | -1.48396  |
| 17 | N | 17 | H | -0.34951  |
| 18 | N | 18 | H | 6.97161   |
| 19 | N | 19 | H | -0.35630  |
| 20 | N | 20 | H | -7.01053  |
| 22 | N | 22 | H | 1.08152   |
| 23 | N | 23 | H | -1.93114  |
| 24 | N | 24 | H | 9.40148   |
| 25 | N | 25 | H | 1.65733   |
| 26 | N | 26 | H | 3.15404   |
| 27 | N | 27 | H | -0.02463  |
| 28 | N | 28 | H | -0.96655  |
| 29 | N | 29 | H | -4.36165  |
| 30 | N | 30 | H | -3.61741  |
| 31 | N | 31 | H | -6.41555  |
| 32 | N | 32 | H | 9.34902   |
| 33 | N | 33 | H | -3.49914  |
| 34 | N | 34 | H | 9.97243   |
| 35 | N | 35 | H | 12.25953  |
| 36 | N | 36 | H | 1.90527   |
| 37 | N | 37 | H | 9.69166   |
| 38 | N | 38 | H | -2.47537  |
| 39 | N | 39 | H | -14.13620 |
| 40 | N | 40 | H | -6.64714  |
| 41 | N | 41 | H | -3.15197  |
| 42 | N | 42 | H | 11.09516  |
| 43 | N | 43 | H | -1.51674  |
| 44 | N | 44 | H | 0.74053   |
| 45 | N | 45 | H | -8.10459  |
| 46 | N | 46 | H | -13.14200 |
| 47 | N | 47 | H | -0.02362  |
| 48 | N | 48 | H | -1.43404  |
| 49 | N | 49 | H | 8.61226   |
| 50 | N | 50 | H | 0.84854   |
| 51 | N | 51 | H | -2.98596  |
| 52 | N | 52 | H | 15.07108  |
| 53 | N | 53 | H | 5.14693   |
| 54 | N | 54 | H | 8.23438   |
| 56 | N | 56 | H | -2.55943  |

57 N 57 H 0.30543  
58 N 58 H 7.38422  
59 N 59 H -2.45203  
60 N 60 H -1.07524  
61 N 61 H 3.10223  
62 N 62 H -4.23509  
63 N 63 H -12.84034  
64 N 64 H -9.71730  
65 N 65 H 5.14132  
66 N 66 H 2.62946  
67 N 67 H -0.03378  
68 N 68 H 2.26858  
69 N 69 H 5.29595  
70 N 70 H 10.63517  
71 N 71 H 0.56899  
72 N 72 H -14.43071  
73 N 73 H -10.49247  
74 N 74 H -10.43578  
75 N 75 H -14.15590  
77 N 77 H 2.64810  
78 N 78 H 5.16638  
79 N 79 H 10.04316  
80 N 80 H 6.72179  
81 N 81 H -2.87978  
82 N 82 H -2.79852  
83 N 83 H 12.63914  
84 N 84 H 6.60045  
86 N 86 H 0.75814  
87 N 87 H 0.30724  
88 N 88 H -9.77827  
90 N 90 H -0.22101  
91 N 91 H -3.55034  
92 N 92 H -12.73839  
93 N 93 H -3.97495  
94 N 94 H -7.37001  
95 N 95 H 10.85247  
96 N 96 H -1.27671  
97 N 97 H 10.49631  
98 N 98 H 11.40687  
99 N 99 H 0.21087  
100 N 100 H 2.01100  
101 N 101 H -1.78405  
102 N 102 H -1.17840  
103 N 103 H 8.77698  
104 N 104 H -3.90349  
105 N 105 H 6.47499  
106 N 106 H 12.01405  
107 N 107 H -4.47797  
108 N 108 H 7.90607  
109 N 109 H 0.10697  
110 N 110 H 4.31412  
111 N 111 H -2.03309  
112 N 112 H -1.57365  
113 N 113 H -1.38382  
114 N 114 H 9.82455  
115 N 115 H 10.91882  
117 N 117 H 0.86716  
118 N 118 H 2.38090  
119 N 119 H 0.85272  
120 N 120 H 1.10897  
121 N 121 H -8.76030  
122 N 122 H -12.62315

123 N 123 H -10.28321  
124 N 124 H 6.80732  
125 N 125 H 14.03762  
126 N 126 H 4.47677  
127 N 127 H -2.57116  
128 N 128 H -4.41530  
130 N 130 H -11.11323  
131 N 131 H -7.58237  
132 N 132 H -5.91508  
133 N 133 H 2.19602  
134 N 134 H 0.23234  
135 N 135 H -6.08194  
136 N 136 H 3.02418  
137 N 137 H -10.85053  
138 N 138 H 6.38151  
139 N 139 H 0.08289  
140 N 140 H 4.60087  
141 N 141 H -11.86752  
142 N 142 H -6.81095  
143 N 143 H 4.28078  
144 N 144 H 6.91522  
145 N 145 H -0.54331  
146 N 146 H -11.63461  
147 N 147 H -6.05659  
148 N 148 H -13.69508  
149 N 149 H 11.97867  
150 N 150 H 9.32606  
151 N 151 H 1.32188

**d. 1i1b\_2**

<same RDC input file as for 1i1b>

**e. 2k5u**

|    |   |    |   |        |
|----|---|----|---|--------|
| 2  | N | 2  | H | 5.88   |
| 7  | N | 7  | H | -13.11 |
| 9  | N | 9  | H | -1.27  |
| 10 | N | 10 | H | -4.31  |
| 11 | N | 11 | H | 16.40  |
| 12 | N | 12 | H | -9.09  |
| 13 | N | 13 | H | 13.90  |
| 14 | N | 14 | H | 3.01   |
| 15 | N | 15 | H | 2.64   |
| 20 | N | 20 | H | -4.82  |
| 21 | N | 21 | H | 3.43   |
| 22 | N | 22 | H | 2.81   |
| 25 | N | 25 | H | -6.01  |
| 30 | N | 30 | H | -4.82  |
| 33 | N | 33 | H | 10.16  |
| 34 | N | 34 | H | 7.54   |
| 35 | N | 35 | H | 6.09   |
| 37 | N | 37 | H | -9.44  |
| 39 | N | 39 | H | -6.77  |
| 42 | N | 42 | H | -3.73  |
| 43 | N | 43 | H | 8.45   |
| 50 | N | 50 | H | -6.09  |
| 52 | N | 52 | H | -12.88 |
| 54 | N | 54 | H | 7.24   |
| 55 | N | 55 | H | 0.06   |
| 56 | N | 56 | H | 6.31   |
| 63 | N | 63 | H | -1.08  |
| 64 | N | 64 | H | -3.45  |
| 67 | N | 67 | H | 0.61   |

|     |   |     |   |        |
|-----|---|-----|---|--------|
| 68  | N | 68  | H | 6.78   |
| 69  | N | 69  | H | 2.74   |
| 72  | N | 72  | H | -8.91  |
| 74  | N | 74  | H | -10.06 |
| 75  | N | 75  | H | -11.72 |
| 76  | N | 76  | H | 2.50   |
| 78  | N | 78  | H | 18.03  |
| 79  | N | 79  | H | 8.28   |
| 80  | N | 80  | H | -7.27  |
| 81  | N | 81  | H | -12.54 |
| 82  | N | 82  | H | 6.56   |
| 84  | N | 84  | H | 22.22  |
| 85  | N | 85  | H | -1.67  |
| 86  | N | 86  | H | -11.73 |
| 87  | N | 87  | H | 1.09   |
| 89  | N | 89  | H | -8.92  |
| 90  | N | 90  | H | -9.06  |
| 91  | N | 91  | H | 3.63   |
| 92  | N | 92  | H | -6.29  |
| 93  | N | 93  | H | -10.12 |
| 94  | N | 94  | H | -6.07  |
| 96  | N | 96  | H | -11.31 |
| 97  | N | 97  | H | -14.73 |
| 98  | N | 98  | H | 19.29  |
| 99  | N | 99  | H | 9.42   |
| 100 | N | 100 | H | -6.10  |
| 101 | N | 101 | H | 8.64   |
| 102 | N | 102 | H | 13.31  |
| 103 | N | 103 | H | -6.50  |
| 104 | N | 104 | H | 11.17  |
| 105 | N | 105 | H | -7.79  |
| 108 | N | 108 | H | -8.51  |
| 109 | N | 109 | H | 2.56   |
| 110 | N | 110 | H | 0.91   |
| 111 | N | 111 | H | 16.02  |
| 112 | N | 112 | H | -1.21  |
| 113 | N | 113 | H | -11.36 |
| 114 | N | 114 | H | -2.80  |
| 115 | N | 115 | H | 4.87   |
| 118 | N | 118 | H | 23.17  |
| 119 | N | 119 | H | -2.42  |
| 120 | N | 120 | H | -4.87  |
| 121 | N | 121 | H | 21.41  |
| 122 | N | 122 | H | 19.18  |
| 123 | N | 123 | H | 16.98  |
| 124 | N | 124 | H | 22.57  |
| 126 | N | 126 | H | 16.76  |
| 127 | N | 127 | H | 22.59  |
| 128 | N | 128 | H | 17.14  |
| 129 | N | 129 | H | 2.98   |
| 130 | N | 130 | H | 1.38   |
| 131 | N | 131 | H | -11.73 |
| 133 | N | 133 | H | 14.06  |
| 134 | N | 134 | H | 9.72   |
| 136 | N | 136 | H | -6.73  |
| 140 | N | 140 | H | -6.49  |
| 141 | N | 141 | H | 0.65   |
| 142 | N | 142 | H | -6.60  |
| 145 | N | 145 | H | 13.52  |
| 146 | N | 146 | H | -2.31  |
| 147 | N | 147 | H | 5.68   |
| 148 | N | 148 | H | 8.26   |

|     |   |     |   |        |
|-----|---|-----|---|--------|
| 149 | N | 149 | H | -13.60 |
| 151 | N | 151 | H | 2.77   |
| 152 | N | 152 | H | 4.41   |
| 153 | N | 153 | H | -4.96  |
| 154 | N | 154 | H | -7.28  |
| 156 | N | 156 | H | -4.13  |
| 157 | N | 157 | H | -8.12  |
| 158 | N | 158 | H | -5.30  |
| 159 | N | 159 | H | 6.61   |
| 160 | N | 160 | H | -2.48  |
| 161 | N | 161 | H | -8.44  |
| 162 | N | 162 | H | 8.45   |
| 163 | N | 163 | H | -2.11  |

**f. 2z2i**

|    |   |    |   |           |
|----|---|----|---|-----------|
| 2  | N | 2  | H | -13.22150 |
| 3  | N | 3  | H | -31.27997 |
| 5  | N | 5  | H | -2.42659  |
| 6  | N | 6  | H | -23.74319 |
| 7  | N | 7  | H | -14.67118 |
| 8  | N | 8  | H | -27.21860 |
| 9  | N | 9  | H | -17.33336 |
| 10 | N | 10 | H | -13.35288 |
| 11 | N | 11 | H | 16.44735  |
| 12 | N | 12 | H | 18.95858  |
| 14 | N | 14 | H | 13.37829  |
| 15 | N | 15 | H | -27.77608 |
| 16 | N | 16 | H | 3.91589   |
| 17 | N | 17 | H | 5.73694   |
| 18 | N | 18 | H | -31.15317 |
| 19 | N | 19 | H | -9.49951  |
| 20 | N | 20 | H | 1.79071   |
| 21 | N | 21 | H | 15.17711  |
| 22 | N | 22 | H | -7.53304  |
| 23 | N | 23 | H | 22.64798  |
| 24 | N | 24 | H | 8.26982   |
| 25 | N | 25 | H | 14.22181  |
| 26 | N | 26 | H | 15.45572  |
| 27 | N | 27 | H | 13.43209  |
| 28 | N | 28 | H | 10.70775  |
| 29 | N | 29 | H | 13.03223  |
| 30 | N | 30 | H | 17.48356  |
| 31 | N | 31 | H | 10.61260  |
| 32 | N | 32 | H | 12.66281  |
| 33 | N | 33 | H | 13.19406  |
| 34 | N | 34 | H | 14.28022  |
| 35 | N | 35 | H | 8.96339   |
| 36 | N | 36 | H | 10.12647  |
| 37 | N | 37 | H | 17.94709  |
| 38 | N | 38 | H | -10.78994 |
| 39 | N | 39 | H | 21.42204  |
| 40 | N | 40 | H | 15.04667  |
| 41 | N | 41 | H | -27.15577 |
| 42 | N | 42 | H | -23.38187 |
| 43 | N | 43 | H | 18.04223  |
| 44 | N | 44 | H | 13.98382  |
| 45 | N | 45 | H | 5.33425   |
| 46 | N | 46 | H | 4.59410   |
| 47 | N | 47 | H | 17.01947  |
| 48 | N | 48 | H | 6.16133   |
| 49 | N | 49 | H | 16.44381  |

50 N 50 H -21.67464  
51 N 51 H -12.56712  
52 N 52 H -23.13396  
53 N 53 H -4.03790  
54 N 54 H 5.50723  
55 N 55 H 16.04771  
56 N 56 H 10.33861  
57 N 57 H -14.52459  
58 N 58 H 22.48349  
59 N 59 H 0.83081  
60 N 60 H 2.98506  
61 N 61 H -20.98924  
62 N 62 H 2.71397  
63 N 63 H -12.28596  
64 N 64 H -10.33312  
66 N 66 H 22.30675  
67 N 67 H -5.12377  
68 N 68 H 1.30698  
69 N 69 H 14.13068  
70 N 70 H -4.18261  
71 N 71 H 10.10933  
72 N 72 H 18.79551  
73 N 73 H 18.96129  
74 N 74 H 19.34731  
75 N 75 H 13.54399  
76 N 76 H 19.00834  
77 N 77 H 10.13606  
79 N 79 H 19.55245  
80 N 80 H 17.13483  
81 N 81 H 7.37598  
82 N 82 H 18.18945  
83 N 83 H 20.28922  
84 N 84 H -10.90945  
85 N 85 H -15.45012  
86 N 86 H 8.19073  
88 N 88 H 20.87398  
89 N 89 H 11.86432  
90 N 90 H -9.78400  
91 N 91 H -7.86747  
92 N 92 H -29.12225  
93 N 93 H -18.48410  
94 N 94 H -25.22773  
95 N 95 H -14.93364  
96 N 96 H 13.02543  
97 N 97 H 17.33407  
98 N 98 H 18.53071  
99 N 99 H 0.39312  
100 N 100 H -27.58619  
101 N 101 H 19.90436  
102 N 102 H 5.25821  
103 N 103 H 12.65751  
104 N 104 H 4.74695  
105 N 105 H -10.62764  
106 N 106 H -19.95868  
107 N 107 H -25.69729  
108 N 108 H -31.64214  
109 N 109 H -28.89925  
110 N 110 H 3.84838  
111 N 111 H -3.30911  
112 N 112 H 11.33800  
113 N 113 H -5.83614  
114 N 114 H 17.08492

115 N 115 H -21.70252  
116 N 116 H 14.51043  
117 N 117 H 21.58880  
118 N 118 H 21.93164  
119 N 119 H 18.51094  
120 N 120 H 18.42168  
121 N 121 H 21.80864  
122 N 122 H 22.21040  
123 N 123 H 14.69217  
124 N 124 H 21.89792  
125 N 125 H 21.36227  
126 N 126 H 1.39552  
127 N 127 H -16.28392  
128 N 128 H -16.20445  
129 N 129 H 16.24792  
130 N 130 H 17.97131  
131 N 131 H 6.24479  
132 N 132 H -32.65418  
133 N 133 H -25.09342  
134 N 134 H -20.30873  
135 N 135 H -4.16459  
136 N 136 H -2.92450  
137 N 137 H 7.65507  
138 N 138 H 0.71040  
139 N 139 H -0.03590  
142 N 142 H 9.39489  
143 N 143 H 9.85048  
144 N 144 H -27.16977  
145 N 145 H -33.81651  
147 N 147 H 11.32286  
148 N 148 H 0.41864  
149 N 149 H -7.08476  
150 N 150 H 5.33451  
151 N 151 H 4.89822  
152 N 152 H -30.49604  
153 N 153 H -2.15987  
154 N 154 H -1.65903  
155 N 155 H -29.05268  
157 N 157 H 13.42262  
158 N 158 H 4.91202  
159 N 159 H 14.20085  
160 N 160 H 18.60660  
161 N 161 H 9.59206  
162 N 162 H -5.32334  
164 N 164 H 19.60042  
165 N 165 H 5.07268  
166 N 166 H 5.20692  
167 N 167 H 19.88966  
168 N 168 H 12.59231  
169 N 169 H -5.46051  
170 N 170 H 8.67825  
171 N 171 H 16.71114  
172 N 172 H 3.18577  
173 N 173 H -4.21729  
174 N 174 H 12.77306  
175 N 175 H 12.84922  
176 N 176 H -6.02342  
177 N 177 H 7.04555  
178 N 178 H 16.82418  
179 N 179 H 2.67463



**g. 2jzc**

|     |   |     |   |        |
|-----|---|-----|---|--------|
| 7   | N | 7   | H | 4.00   |
| 8   | N | 8   | H | 13.20  |
| 9   | N | 9   | H | 7.10   |
| 10  | N | 10  | H | 12.10  |
| 11  | N | 11  | H | 3.80   |
| 12  | N | 12  | H | 8.00   |
| 20  | N | 20  | H | 7.10   |
| 21  | N | 21  | H | -7.70  |
| 23  | N | 23  | H | -0.20  |
| 24  | N | 24  | H | 5.40   |
| 25  | N | 25  | H | -5.60  |
| 26  | N | 26  | H | 2.60   |
| 27  | N | 27  | H | 10.30  |
| 28  | N | 28  | H | -2.50  |
| 29  | N | 29  | H | -1.30  |
| 30  | N | 30  | H | -5.60  |
| 31  | N | 31  | H | -0.70  |
| 33  | N | 33  | H | -1.20  |
| 34  | N | 34  | H | 0.40   |
| 35  | N | 35  | H | -0.90  |
| 36  | N | 36  | H | -1.50  |
| 37  | N | 37  | H | -1.20  |
| 38  | N | 38  | H | -2.20  |
| 39  | N | 39  | H | -10.50 |
| 40  | N | 40  | H | -0.50  |
| 42  | N | 42  | H | 14.50  |
| 43  | N | 43  | H | 7.40   |
| 44  | N | 44  | H | 11.50  |
| 60  | N | 60  | H | 4.60   |
| 61  | N | 61  | H | -4.90  |
| 62  | N | 62  | H | -2.00  |
| 63  | N | 63  | H | 6.20   |
| 64  | N | 64  | H | 5.20   |
| 65  | N | 65  | H | 4.00   |
| 66  | N | 66  | H | 11.40  |
| 67  | N | 67  | H | -3.00  |
| 72  | N | 72  | H | 6.50   |
| 73  | N | 73  | H | -0.70  |
| 74  | N | 74  | H | 6.30   |
| 81  | N | 81  | H | -7.70  |
| 82  | N | 82  | H | 10.00  |
| 83  | N | 83  | H | 4.60   |
| 84  | N | 84  | H | 12.90  |
| 85  | N | 85  | H | 5.80   |
| 86  | N | 86  | H | 2.30   |
| 87  | N | 87  | H | 0.30   |
| 91  | N | 91  | H | 5.10   |
| 92  | N | 92  | H | 4.50   |
| 93  | N | 93  | H | 12.60  |
| 94  | N | 94  | H | 6.60   |
| 95  | N | 95  | H | 12.10  |
| 101 | N | 101 | H | 2.60   |
| 102 | N | 102 | H | -3.10  |
| 103 | N | 103 | H | -8.00  |
| 104 | N | 104 | H | -3.20  |
| 106 | N | 106 | H | -1.80  |
| 107 | N | 107 | H | -7.00  |
| 108 | N | 108 | H | -5.60  |
| 109 | N | 109 | H | 1.00   |
| 112 | N | 112 | H | -1.50  |

|     |   |     |   |        |
|-----|---|-----|---|--------|
| 113 | N | 113 | H | 9.80   |
| 114 | N | 114 | H | 6.60   |
| 115 | N | 115 | H | -0.80  |
| 116 | N | 116 | H | 1.10   |
| 120 | N | 120 | H | -1.40  |
| 121 | N | 121 | H | -3.00  |
| 122 | N | 122 | H | 1.40   |
| 123 | N | 123 | H | -5.30  |
| 124 | N | 124 | H | -0.70  |
| 125 | N | 125 | H | -3.50  |
| 126 | N | 126 | H | -16.10 |
| 128 | N | 128 | H | -1.10  |
| 129 | N | 129 | H | 2.70   |
| 133 | N | 133 | H | 6.00   |
| 134 | N | 134 | H | 1.10   |
| 135 | N | 135 | H | -7.50  |
| 137 | N | 137 | H | -3.80  |
| 147 | N | 147 | H | -1.90  |
| 148 | N | 148 | H | 2.60   |
| 149 | N | 149 | H | -3.90  |
| 150 | N | 150 | H | -0.20  |
| 151 | N | 151 | H | -2.10  |
| 152 | N | 152 | H | 2.60   |
| 153 | N | 153 | H | -1.80  |
| 154 | N | 154 | H | -3.30  |
| 155 | N | 155 | H | -1.20  |
| 156 | N | 156 | H | -4.30  |
| 157 | N | 157 | H | 4.20   |
| 158 | N | 158 | H | 5.80   |
| 159 | N | 159 | H | 2.30   |
| 160 | N | 160 | H | -6.00  |
| 162 | N | 162 | H | -7.60  |
| 164 | N | 164 | H | 1.70   |
| 165 | N | 165 | H | -1.50  |
| 166 | N | 166 | H | -2.10  |
| 167 | N | 167 | H | -1.00  |
| 168 | N | 168 | H | 2.70   |
| 169 | N | 169 | H | -4.40  |
| 171 | N | 171 | H | 1.00   |
| 172 | N | 172 | H | -1.50  |
| 173 | N | 173 | H | -2.20  |
| 174 | N | 174 | H | -0.40  |
| 176 | N | 176 | H | -7.80  |
| 177 | N | 177 | H | -3.90  |
| 178 | N | 178 | H | 0.10   |
| 179 | N | 179 | H | 0.00   |
| 180 | N | 180 | H | 6.10   |
| 190 | N | 190 | H | -2.90  |
| 191 | N | 191 | H | -3.00  |
| 192 | N | 192 | H | -8.40  |
| 193 | N | 193 | H | -7.50  |
| 194 | N | 194 | H | -4.40  |
| 195 | N | 195 | H | -5.40  |
| 196 | N | 196 | H | -9.40  |
| 197 | N | 197 | H | -6.50  |

## 2.2.4. NOE RESTRAINT INPUT FILES

### a. 2jyx

```
AtomPair H 73 H 115 BOUNDED 1.5 6.27 0.59 NOE ;rawdata 5.980000
AtomPair H 69 H 85 BOUNDED 1.5 4.70 0.44 NOE ;rawdata 4.480000
AtomPair H 71 H 85 BOUNDED 1.5 5.21 0.49 NOE ;rawdata 4.970000
```

|          |   |    |   |     |         |     |      |      |     |          |          |
|----------|---|----|---|-----|---------|-----|------|------|-----|----------|----------|
| AtomPair | H | 84 | H | 92  | BOUNDED | 1.5 | 4.41 | 0.42 | NOE | ;rawdata | 4.200000 |
| AtomPair | H | 91 | H | 105 | BOUNDED | 1.5 | 6.30 | 0.60 | NOE | ;rawdata | 6.000000 |
| AtomPair | H | 68 | H | 85  | BOUNDED | 1.5 | 5.52 | 0.52 | NOE | ;rawdata | 5.260000 |
| AtomPair | H | 58 | H | 119 | BOUNDED | 1.5 | 4.04 | 0.38 | NOE | ;rawdata | 3.850000 |
| AtomPair | H | 70 | H | 118 | BOUNDED | 1.5 | 4.48 | 0.42 | NOE | ;rawdata | 4.270000 |
| AtomPair | H | 93 | H | 101 | BOUNDED | 1.5 | 4.50 | 0.42 | NOE | ;rawdata | 4.290000 |
| AtomPair | H | 74 | H | 115 | BOUNDED | 1.5 | 5.00 | 0.47 | NOE | ;rawdata | 4.770000 |
| AtomPair | H | 71 | H | 83  | BOUNDED | 1.5 | 4.49 | 0.42 | NOE | ;rawdata | 4.280000 |
| AtomPair | H | 22 | H | 29  | BOUNDED | 1.5 | 6.01 | 0.57 | NOE | ;rawdata | 5.730000 |
| AtomPair | H | 95 | H | 99  | BOUNDED | 1.5 | 5.34 | 0.50 | NOE | ;rawdata | 5.090000 |
| AtomPair | H | 49 | H | 52  | BOUNDED | 1.5 | 5.84 | 0.55 | NOE | ;rawdata | 5.570000 |
| AtomPair | H | 95 | H | 101 | BOUNDED | 1.5 | 5.28 | 0.50 | NOE | ;rawdata | 5.030000 |
| AtomPair | H | 19 | H | 28  | BOUNDED | 1.5 | 4.92 | 0.46 | NOE | ;rawdata | 4.690000 |

## b. 2kd7

|          |   |    |   |     |         |     |      |      |     |          |      |
|----------|---|----|---|-----|---------|-----|------|------|-----|----------|------|
| AtomPair | H | 13 | H | 59  | BOUNDED | 1.5 | 5.76 | 0.55 | NOE | ;rawdata | 5.49 |
| AtomPair | H | 28 | H | 41  | BOUNDED | 1.5 | 4.49 | 0.43 | NOE | ;rawdata | 4.28 |
| AtomPair | H | 19 | H | 29  | BOUNDED | 1.5 | 5.97 | 0.57 | NOE | ;rawdata | 5.69 |
| AtomPair | H | 29 | H | 43  | BOUNDED | 1.5 | 5.55 | 0.53 | NOE | ;rawdata | 5.29 |
| AtomPair | H | 28 | H | 42  | BOUNDED | 1.5 | 5.65 | 0.54 | NOE | ;rawdata | 5.38 |
| AtomPair | H | 44 | H | 138 | BOUNDED | 1.5 | 4.59 | 0.44 | NOE | ;rawdata | 4.37 |
| AtomPair | H | 22 | H | 47  | BOUNDED | 1.5 | 5.95 | 0.57 | NOE | ;rawdata | 5.67 |
| AtomPair | H | 57 | H | 128 | BOUNDED | 1.5 | 5.96 | 0.57 | NOE | ;rawdata | 5.68 |
| AtomPair | H | 13 | H | 58  | BOUNDED | 1.5 | 5.59 | 0.53 | NOE | ;rawdata | 5.32 |
| AtomPair | H | 88 | H | 100 | BOUNDED | 1.5 | 5.12 | 0.49 | NOE | ;rawdata | 4.88 |
| AtomPair | H | 90 | H | 100 | BOUNDED | 1.5 | 4.89 | 0.47 | NOE | ;rawdata | 4.66 |
| AtomPair | H | 90 | H | 98  | BOUNDED | 1.5 | 3.99 | 0.38 | NOE | ;rawdata | 3.80 |
| AtomPair | H | 88 | H | 103 | BOUNDED | 1.5 | 6.02 | 0.57 | NOE | ;rawdata | 5.73 |
| AtomPair | H | 86 | H | 103 | BOUNDED | 1.5 | 3.98 | 0.38 | NOE | ;rawdata | 3.79 |
| AtomPair | H | 67 | H | 120 | BOUNDED | 1.5 | 5.97 | 0.57 | NOE | ;rawdata | 5.69 |
| AtomPair | H | 57 | H | 126 | BOUNDED | 1.5 | 4.15 | 0.40 | NOE | ;rawdata | 3.95 |
| AtomPair | H | 59 | H | 126 | BOUNDED | 1.5 | 5.21 | 0.50 | NOE | ;rawdata | 4.96 |
| AtomPair | H | 44 | H | 139 | BOUNDED | 1.5 | 5.66 | 0.54 | NOE | ;rawdata | 5.39 |
| AtomPair | H | 5  | H | 145 | BOUNDED | 1.5 | 5.13 | 0.49 | NOE | ;rawdata | 4.89 |
| AtomPair | H | 68 | H | 146 | BOUNDED | 1.5 | 5.27 | 0.50 | NOE | ;rawdata | 5.02 |
| AtomPair | H | 68 | H | 147 | BOUNDED | 1.5 | 5.39 | 0.51 | NOE | ;rawdata | 5.13 |

## c. 1i1b

|          |   |    |   |     |         |     |      |      |         |          |      |
|----------|---|----|---|-----|---------|-----|------|------|---------|----------|------|
| AtomPair | H | 2  | H | 44  | BOUNDED | 1.5 | 6.00 | 0.40 | SIM_NOE | ;rawdata | 0.00 |
| AtomPair | H | 4  | H | 42  | BOUNDED | 1.5 | 6.00 | 0.40 | SIM_NOE | ;rawdata | 0.00 |
| AtomPair | H | 6  | H | 40  | BOUNDED | 1.5 | 6.00 | 0.40 | SIM_NOE | ;rawdata | 0.00 |
| AtomPair | H | 7  | H | 147 | BOUNDED | 1.5 | 6.00 | 0.40 | SIM_NOE | ;rawdata | 0.00 |
| AtomPair | H | 9  | H | 145 | BOUNDED | 1.5 | 6.00 | 0.40 | SIM_NOE | ;rawdata | 0.00 |
| AtomPair | H | 11 | H | 143 | BOUNDED | 1.5 | 6.00 | 0.40 | SIM_NOE | ;rawdata | 0.00 |
| AtomPair | H | 15 | H | 27  | BOUNDED | 1.5 | 6.00 | 0.40 | SIM_NOE | ;rawdata | 0.00 |
| AtomPair | H | 15 | H | 29  | BOUNDED | 1.5 | 6.00 | 0.40 | SIM_NOE | ;rawdata | 0.00 |
| AtomPair | H | 17 | H | 25  | BOUNDED | 1.5 | 6.00 | 0.40 | SIM_NOE | ;rawdata | 0.00 |
| AtomPair | H | 19 | H | 25  | BOUNDED | 1.5 | 6.00 | 0.40 | SIM_NOE | ;rawdata | 0.00 |
| AtomPair | H | 24 | H | 130 | BOUNDED | 1.5 | 6.00 | 0.40 | SIM_NOE | ;rawdata | 0.00 |
| AtomPair | H | 26 | H | 128 | BOUNDED | 1.5 | 6.00 | 0.40 | SIM_NOE | ;rawdata | 0.00 |
| AtomPair | H | 41 | H | 59  | BOUNDED | 1.5 | 6.00 | 0.40 | SIM_NOE | ;rawdata | 0.00 |
| AtomPair | H | 41 | H | 61  | BOUNDED | 1.5 | 6.00 | 0.40 | SIM_NOE | ;rawdata | 0.00 |
| AtomPair | H | 43 | H | 57  | BOUNDED | 1.5 | 6.00 | 0.40 | SIM_NOE | ;rawdata | 0.00 |
| AtomPair | H | 45 | H | 57  | BOUNDED | 1.5 | 6.00 | 0.40 | SIM_NOE | ;rawdata | 0.00 |
| AtomPair | H | 46 | H | 93  | BOUNDED | 1.5 | 6.00 | 0.40 | SIM_NOE | ;rawdata | 0.00 |
| AtomPair | H | 54 | H | 101 | BOUNDED | 1.5 | 6.00 | 0.40 | SIM_NOE | ;rawdata | 0.00 |
| AtomPair | H | 56 | H | 99  | BOUNDED | 1.5 | 6.00 | 0.40 | SIM_NOE | ;rawdata | 0.00 |
| AtomPair | H | 56 | H | 101 | BOUNDED | 1.5 | 6.00 | 0.40 | SIM_NOE | ;rawdata | 0.00 |
| AtomPair | H | 66 | H | 81  | BOUNDED | 1.5 | 6.00 | 0.40 | SIM_NOE | ;rawdata | 0.00 |
| AtomPair | H | 68 | H | 79  | BOUNDED | 1.5 | 6.00 | 0.40 | SIM_NOE | ;rawdata | 0.00 |
| AtomPair | H | 70 | H | 77  | BOUNDED | 1.5 | 6.00 | 0.40 | SIM_NOE | ;rawdata | 0.00 |



|          |   |     |   |     |         |     |      |      |         |          |      |
|----------|---|-----|---|-----|---------|-----|------|------|---------|----------|------|
| AtomPair | H | 58  | H | 67  | BOUNDED | 1.5 | 6.00 | 0.40 | SIM_NOE | ;rawdata | 0.00 |
| AtomPair | H | 66  | H | 81  | BOUNDED | 1.5 | 6.00 | 0.40 | SIM_NOE | ;rawdata | 0.00 |
| AtomPair | H | 66  | H | 82  | BOUNDED | 1.5 | 6.00 | 0.40 | SIM_NOE | ;rawdata | 0.00 |
| AtomPair | H | 67  | H | 81  | BOUNDED | 1.5 | 6.00 | 0.40 | SIM_NOE | ;rawdata | 0.00 |
| AtomPair | H | 68  | H | 79  | BOUNDED | 1.5 | 6.00 | 0.40 | SIM_NOE | ;rawdata | 0.00 |
| AtomPair | H | 68  | H | 81  | BOUNDED | 1.5 | 6.00 | 0.40 | SIM_NOE | ;rawdata | 0.00 |
| AtomPair | H | 69  | H | 79  | BOUNDED | 1.5 | 6.00 | 0.40 | SIM_NOE | ;rawdata | 0.00 |
| AtomPair | H | 69  | H | 97  | BOUNDED | 1.5 | 6.00 | 0.40 | SIM_NOE | ;rawdata | 0.00 |
| AtomPair | H | 70  | H | 77  | BOUNDED | 1.5 | 6.00 | 0.40 | SIM_NOE | ;rawdata | 0.00 |
| AtomPair | H | 70  | H | 79  | BOUNDED | 1.5 | 6.00 | 0.40 | SIM_NOE | ;rawdata | 0.00 |
| AtomPair | H | 71  | H | 77  | BOUNDED | 1.5 | 6.00 | 0.40 | SIM_NOE | ;rawdata | 0.00 |
| AtomPair | H | 78  | H | 132 | BOUNDED | 1.5 | 6.00 | 0.40 | SIM_NOE | ;rawdata | 0.00 |
| AtomPair | H | 98  | H | 113 | BOUNDED | 1.5 | 6.00 | 0.40 | SIM_NOE | ;rawdata | 0.00 |
| AtomPair | H | 99  | H | 113 | BOUNDED | 1.5 | 6.00 | 0.40 | SIM_NOE | ;rawdata | 0.00 |
| AtomPair | H | 100 | H | 111 | BOUNDED | 1.5 | 6.00 | 0.40 | SIM_NOE | ;rawdata | 0.00 |
| AtomPair | H | 100 | H | 112 | BOUNDED | 1.5 | 6.00 | 0.40 | SIM_NOE | ;rawdata | 0.00 |
| AtomPair | H | 100 | H | 113 | BOUNDED | 1.5 | 6.00 | 0.40 | SIM_NOE | ;rawdata | 0.00 |
| AtomPair | H | 102 | H | 109 | BOUNDED | 1.5 | 6.00 | 0.40 | SIM_NOE | ;rawdata | 0.00 |
| AtomPair | H | 102 | H | 110 | BOUNDED | 1.5 | 6.00 | 0.40 | SIM_NOE | ;rawdata | 0.00 |
| AtomPair | H | 102 | H | 111 | BOUNDED | 1.5 | 6.00 | 0.40 | SIM_NOE | ;rawdata | 0.00 |
| AtomPair | H | 108 | H | 144 | BOUNDED | 1.5 | 6.00 | 0.40 | SIM_NOE | ;rawdata | 0.00 |
| AtomPair | H | 108 | H | 145 | BOUNDED | 1.5 | 6.00 | 0.40 | SIM_NOE | ;rawdata | 0.00 |
| AtomPair | H | 109 | H | 144 | BOUNDED | 1.5 | 6.00 | 0.40 | SIM_NOE | ;rawdata | 0.00 |
| AtomPair | H | 110 | H | 120 | BOUNDED | 1.5 | 6.00 | 0.40 | SIM_NOE | ;rawdata | 0.00 |
| AtomPair | H | 112 | H | 118 | BOUNDED | 1.5 | 6.00 | 0.40 | SIM_NOE | ;rawdata | 0.00 |
| AtomPair | H | 112 | H | 119 | BOUNDED | 1.5 | 6.00 | 0.40 | SIM_NOE | ;rawdata | 0.00 |
| AtomPair | H | 112 | H | 120 | BOUNDED | 1.5 | 6.00 | 0.40 | SIM_NOE | ;rawdata | 0.00 |
| AtomPair | H | 119 | H | 133 | BOUNDED | 1.5 | 6.00 | 0.40 | SIM_NOE | ;rawdata | 0.00 |
| AtomPair | H | 121 | H | 131 | BOUNDED | 1.5 | 6.00 | 0.40 | SIM_NOE | ;rawdata | 0.00 |
| AtomPair | H | 121 | H | 132 | BOUNDED | 1.5 | 6.00 | 0.40 | SIM_NOE | ;rawdata | 0.00 |
| AtomPair | H | 121 | H | 133 | BOUNDED | 1.5 | 6.00 | 0.40 | SIM_NOE | ;rawdata | 0.00 |
| AtomPair | H | 122 | H | 141 | BOUNDED | 1.5 | 6.00 | 0.40 | SIM_NOE | ;rawdata | 0.00 |
| AtomPair | H | 122 | H | 142 | BOUNDED | 1.5 | 6.00 | 0.40 | SIM_NOE | ;rawdata | 0.00 |
| AtomPair | H | 123 | H | 141 | BOUNDED | 1.5 | 6.00 | 0.40 | SIM_NOE | ;rawdata | 0.00 |
| AtomPair | H | 124 | H | 141 | BOUNDED | 1.5 | 6.00 | 0.40 | SIM_NOE | ;rawdata | 0.00 |

#### e. 2k5u

|          |   |     |   |     |         |     |      |      |     |  |  |
|----------|---|-----|---|-----|---------|-----|------|------|-----|--|--|
| AtomPair | H | 9   | H | 53  | BOUNDED | 1.5 | 4.50 | 0.40 | NOE |  |  |
| AtomPair | H | 11  | H | 53  | BOUNDED | 1.5 | 6.50 | 0.40 | NOE |  |  |
| AtomPair | H | 28  | H | 40  | BOUNDED | 1.5 | 6.50 | 0.40 | NOE |  |  |
| AtomPair | H | 38  | H | 30  | BOUNDED | 1.5 | 4.50 | 0.40 | NOE |  |  |
| AtomPair | H | 39  | H | 50  | BOUNDED | 1.5 | 4.50 | 0.40 | NOE |  |  |
| AtomPair | H | 40  | H | 28  | BOUNDED | 1.5 | 4.50 | 0.40 | NOE |  |  |
| AtomPair | H | 50  | H | 39  | BOUNDED | 1.5 | 4.50 | 0.40 | NOE |  |  |
| AtomPair | H | 53  | H | 9   | BOUNDED | 1.5 | 4.50 | 0.40 | NOE |  |  |
| AtomPair | H | 53  | H | 11  | BOUNDED | 1.5 | 6.50 | 0.40 | NOE |  |  |
| AtomPair | H | 79  | H | 111 | BOUNDED | 1.5 | 6.50 | 0.40 | NOE |  |  |
| AtomPair | H | 111 | H | 79  | BOUNDED | 1.5 | 6.50 | 0.40 | NOE |  |  |
| AtomPair | H | 112 | H | 145 | BOUNDED | 1.5 | 6.50 | 0.40 | NOE |  |  |
| AtomPair | H | 113 | H | 145 | BOUNDED | 1.5 | 6.50 | 0.40 | NOE |  |  |
| AtomPair | H | 119 | H | 81  | BOUNDED | 1.5 | 6.50 | 0.40 | NOE |  |  |
| AtomPair | H | 143 | H | 112 | BOUNDED | 1.5 | 6.50 | 0.40 | NOE |  |  |
| AtomPair | H | 143 | H | 113 | BOUNDED | 1.5 | 6.50 | 0.40 | NOE |  |  |

#### f. 2z2i

|          |   |   |   |    |         |     |      |      |         |  |  |
|----------|---|---|---|----|---------|-----|------|------|---------|--|--|
| AtomPair | H | 5 | H | 61 | BOUNDED | 1.5 | 6.00 | 0.40 | SIM_NOE |  |  |
| AtomPair | H | 6 | H | 91 | BOUNDED | 1.5 | 6.00 | 0.40 | SIM_NOE |  |  |
| AtomPair | H | 7 | H | 61 | BOUNDED | 1.5 | 6.00 | 0.40 | SIM_NOE |  |  |
| AtomPair | H | 8 | H | 91 | BOUNDED | 1.5 | 6.00 | 0.40 | SIM_NOE |  |  |
| AtomPair | H | 8 | H | 93 | BOUNDED | 1.5 | 6.00 | 0.40 | SIM_NOE |  |  |

|          |   |     |   |     |         |     |      |      |         |
|----------|---|-----|---|-----|---------|-----|------|------|---------|
| AtomPair | H | 9   | H | 63  | BOUNDED | 1.5 | 6.00 | 0.40 | SIM_NOE |
| AtomPair | H | 10  | H | 25  | BOUNDED | 1.5 | 6.00 | 0.40 | SIM_NOE |
| AtomPair | H | 21  | H | 152 | BOUNDED | 1.5 | 6.00 | 0.40 | SIM_NOE |
| AtomPair | H | 25  | H | 95  | BOUNDED | 1.5 | 6.00 | 0.40 | SIM_NOE |
| AtomPair | H | 41  | H | 50  | BOUNDED | 1.5 | 6.00 | 0.40 | SIM_NOE |
| AtomPair | H | 49  | H | 64  | BOUNDED | 1.5 | 6.00 | 0.40 | SIM_NOE |
| AtomPair | H | 51  | H | 62  | BOUNDED | 1.5 | 6.00 | 0.40 | SIM_NOE |
| AtomPair | H | 53  | H | 60  | BOUNDED | 1.5 | 6.00 | 0.40 | SIM_NOE |
| AtomPair | H | 73  | H | 121 | BOUNDED | 1.5 | 6.00 | 0.40 | SIM_NOE |
| AtomPair | H | 90  | H | 131 | BOUNDED | 1.5 | 6.00 | 0.40 | SIM_NOE |
| AtomPair | H | 92  | H | 133 | BOUNDED | 1.5 | 6.00 | 0.40 | SIM_NOE |
| AtomPair | H | 94  | H | 133 | BOUNDED | 1.5 | 6.00 | 0.40 | SIM_NOE |
| AtomPair | H | 94  | H | 135 | BOUNDED | 1.5 | 6.00 | 0.40 | SIM_NOE |
| AtomPair | H | 96  | H | 135 | BOUNDED | 1.5 | 6.00 | 0.40 | SIM_NOE |
| AtomPair | H | 96  | H | 137 | BOUNDED | 1.5 | 6.00 | 0.40 | SIM_NOE |
| AtomPair | H | 99  | H | 137 | BOUNDED | 1.5 | 6.00 | 0.40 | SIM_NOE |
| AtomPair | H | 99  | H | 138 | BOUNDED | 1.5 | 6.00 | 0.40 | SIM_NOE |
| AtomPair | H | 101 | H | 138 | BOUNDED | 1.5 | 6.00 | 0.40 | SIM_NOE |
| AtomPair | H | 103 | H | 136 | BOUNDED | 1.5 | 6.00 | 0.40 | SIM_NOE |
| AtomPair | H | 105 | H | 134 | BOUNDED | 1.5 | 6.00 | 0.40 | SIM_NOE |
| AtomPair | H | 107 | H | 132 | BOUNDED | 1.5 | 6.00 | 0.40 | SIM_NOE |
| AtomPair | H | 109 | H | 130 | BOUNDED | 1.5 | 6.00 | 0.40 | SIM_NOE |

**g. 2jzc**

|          |   |    |   |     |         |     |      |      |                   |
|----------|---|----|---|-----|---------|-----|------|------|-------------------|
| AtomPair | H | 7  | H | 40  | BOUNDED | 1.5 | 7.35 | 0.70 | NOE ;rawdata 7.00 |
| AtomPair | H | 7  | H | 41  | BOUNDED | 1.5 | 6.16 | 0.59 | NOE ;rawdata 5.87 |
| AtomPair | H | 7  | H | 110 | BOUNDED | 1.5 | 6.39 | 0.61 | NOE ;rawdata 6.09 |
| AtomPair | H | 7  | H | 111 | BOUNDED | 1.5 | 4.45 | 0.42 | NOE ;rawdata 4.24 |
| AtomPair | H | 7  | H | 112 | BOUNDED | 1.5 | 4.30 | 0.41 | NOE ;rawdata 4.10 |
| AtomPair | H | 8  | H | 40  | BOUNDED | 1.5 | 6.49 | 0.62 | NOE ;rawdata 6.18 |
| AtomPair | H | 8  | H | 41  | BOUNDED | 1.5 | 4.88 | 0.47 | NOE ;rawdata 4.65 |
| AtomPair | H | 8  | H | 42  | BOUNDED | 1.5 | 5.12 | 0.49 | NOE ;rawdata 4.88 |
| AtomPair | H | 8  | H | 43  | BOUNDED | 1.5 | 4.83 | 0.46 | NOE ;rawdata 4.60 |
| AtomPair | H | 8  | H | 112 | BOUNDED | 1.5 | 6.45 | 0.61 | NOE ;rawdata 6.14 |
| AtomPair | H | 9  | H | 111 | BOUNDED | 1.5 | 6.39 | 0.61 | NOE ;rawdata 6.09 |
| AtomPair | H | 9  | H | 112 | BOUNDED | 1.5 | 4.87 | 0.46 | NOE ;rawdata 4.64 |
| AtomPair | H | 9  | H | 113 | BOUNDED | 1.5 | 5.41 | 0.52 | NOE ;rawdata 5.15 |
| AtomPair | H | 10 | H | 43  | BOUNDED | 1.5 | 4.53 | 0.43 | NOE ;rawdata 4.31 |
| AtomPair | H | 10 | H | 45  | BOUNDED | 1.5 | 4.68 | 0.45 | NOE ;rawdata 4.46 |
| AtomPair | H | 10 | H | 114 | BOUNDED | 1.5 | 5.75 | 0.55 | NOE ;rawdata 5.48 |
| AtomPair | H | 11 | H | 45  | BOUNDED | 1.5 | 5.89 | 0.56 | NOE ;rawdata 5.61 |
| AtomPair | H | 11 | H | 114 | BOUNDED | 1.5 | 4.87 | 0.46 | NOE ;rawdata 4.64 |
| AtomPair | H | 11 | H | 116 | BOUNDED | 1.5 | 5.40 | 0.51 | NOE ;rawdata 5.14 |
| AtomPair | H | 12 | H | 45  | BOUNDED | 1.5 | 4.86 | 0.46 | NOE ;rawdata 4.63 |
| AtomPair | H | 40 | H | 92  | BOUNDED | 1.5 | 6.77 | 0.65 | NOE ;rawdata 6.45 |
| AtomPair | H | 41 | H | 92  | BOUNDED | 1.5 | 6.23 | 0.59 | NOE ;rawdata 5.93 |
| AtomPair | H | 42 | H | 92  | BOUNDED | 1.5 | 4.68 | 0.45 | NOE ;rawdata 4.46 |
| AtomPair | H | 44 | H | 94  | BOUNDED | 1.5 | 4.42 | 0.42 | NOE ;rawdata 4.21 |
| AtomPair | H | 44 | H | 95  | BOUNDED | 1.5 | 6.18 | 0.59 | NOE ;rawdata 5.89 |
| AtomPair | H | 64 | H | 85  | BOUNDED | 1.5 | 3.84 | 0.37 | NOE ;rawdata 3.66 |
| AtomPair | H | 64 | H | 86  | BOUNDED | 1.5 | 5.79 | 0.55 | NOE ;rawdata 5.51 |
| AtomPair | H | 65 | H | 85  | BOUNDED | 1.5 | 7.23 | 0.69 | NOE ;rawdata 6.89 |
| AtomPair | H | 66 | H | 83  | BOUNDED | 1.5 | 4.51 | 0.43 | NOE ;rawdata 4.30 |
| AtomPair | H | 66 | H | 84  | BOUNDED | 1.5 | 5.32 | 0.51 | NOE ;rawdata 5.07 |
| AtomPair | H | 66 | H | 85  | BOUNDED | 1.5 | 6.10 | 0.58 | NOE ;rawdata 5.81 |
| AtomPair | H | 66 | H | 95  | BOUNDED | 1.5 | 7.35 | 0.70 | NOE ;rawdata 7.00 |
| AtomPair | H | 81 | H | 95  | BOUNDED | 1.5 | 6.86 | 0.65 | NOE ;rawdata 6.53 |
| AtomPair | H | 82 | H | 95  | BOUNDED | 1.5 | 4.30 | 0.41 | NOE ;rawdata 4.10 |
| AtomPair | H | 83 | H | 94  | BOUNDED | 1.5 | 7.35 | 0.70 | NOE ;rawdata 7.00 |
| AtomPair | H | 83 | H | 95  | BOUNDED | 1.5 | 5.53 | 0.53 | NOE ;rawdata 5.27 |
| AtomPair | H | 84 | H | 93  | BOUNDED | 1.5 | 3.86 | 0.37 | NOE ;rawdata 3.68 |

|          |   |     |   |     |         |     |      |      |              |      |
|----------|---|-----|---|-----|---------|-----|------|------|--------------|------|
| AtomPair | H | 84  | H | 94  | BOUNDED | 1.5 | 6.21 | 0.59 | NOE ;rawdata | 5.91 |
| AtomPair | H | 84  | H | 95  | BOUNDED | 1.5 | 6.55 | 0.62 | NOE ;rawdata | 6.24 |
| AtomPair | H | 86  | H | 92  | BOUNDED | 1.5 | 6.37 | 0.61 | NOE ;rawdata | 6.07 |
| AtomPair | H | 113 | H | 125 | BOUNDED | 1.5 | 7.35 | 0.70 | NOE ;rawdata | 7.00 |
| AtomPair | H | 113 | H | 133 | BOUNDED | 1.5 | 4.79 | 0.46 | NOE ;rawdata | 4.56 |
| AtomPair | H | 115 | H | 122 | BOUNDED | 1.5 | 7.35 | 0.70 | NOE ;rawdata | 7.00 |
| AtomPair | H | 115 | H | 134 | BOUNDED | 1.5 | 5.85 | 0.56 | NOE ;rawdata | 5.57 |
| AtomPair | H | 116 | H | 135 | BOUNDED | 1.5 | 5.40 | 0.51 | NOE ;rawdata | 5.14 |
| AtomPair | H | 118 | H | 135 | BOUNDED | 1.5 | 7.35 | 0.70 | NOE ;rawdata | 7.00 |
| AtomPair | H | 133 | H | 175 | BOUNDED | 1.5 | 7.35 | 0.70 | NOE ;rawdata | 7.00 |
| AtomPair | H | 134 | H | 159 | BOUNDED | 1.5 | 4.70 | 0.45 | NOE ;rawdata | 4.48 |
| AtomPair | H | 134 | H | 160 | BOUNDED | 1.5 | 5.20 | 0.49 | NOE ;rawdata | 4.95 |
| AtomPair | H | 134 | H | 161 | BOUNDED | 1.5 | 4.91 | 0.47 | NOE ;rawdata | 4.68 |
| AtomPair | H | 135 | H | 161 | BOUNDED | 1.5 | 4.65 | 0.44 | NOE ;rawdata | 4.43 |
| AtomPair | H | 136 | H | 161 | BOUNDED | 1.5 | 4.07 | 0.39 | NOE ;rawdata | 3.88 |
